# Supplementary material for: Comparative modeling of microwave and ultrasound assisted extraction of phenolics and berberine from Coptis teeta Wall. rhizomes
Source: Royal Society of Chemistry journal article supplement (doi:10.1039/d4fb00382a), 2025-01-01
Supplement: d4fb00382a1.pdf [file d4fb00382a1.pdf]

## SUPPLEMENTARY INFORMATION

### Comparative modeling of microwave and ultrasound assisted extraction of phenolics and Berberine from *Coptis teeta* Wall rhizome

Lopamudra Sarma<sup>a</sup>, Falguni Patra<sup>b</sup>, Pallab Kumar Borah<sup>c</sup>, Sunil Meena<sup>d</sup>, Raj Kumar Duary<sup>a,d\*</sup>

<sup>a</sup>*Department of Food Engineering and Technology, School of Engineering, Tezpur University, Napaam, 784028, India*

<sup>b</sup>*Mansinhbhai Institute of Dairy and Food Technology, Dudsagar Dairy, Mehsana, 384002, India*

<sup>c</sup>*Heinz Maier-Leibnitz Zentrum, Technical University of Munich, Lichtenbergstraße 1, 85748, Germany*

<sup>d</sup>*Department of Dairy Science and Food Technology, Institute of Agricultural Sciences, Banaras Hindu University, Varanasi, 221005, India*

#### **Corresponding author**

\*Prof. Raj Kumar Duary, E-mail address: rkduary@bhu.ac.in

**Table S1:** The coded values and corresponding actual values of the optimization parameters used for microwave-assisted extraction

| Independent variable      | Coded | Uncoded | Level |      |      |
|---------------------------|-------|---------|-------|------|------|
|                           |       |         | -1    | 0    | 1    |
| Solvent concentration (%) | $x_1$ | $X_1$   | 50    | 60   | 70   |
| Time (min)                | $x_2$ | $X_2$   | 1     | 15   | 30   |
| Microwave Power (W)       | $x_3$ | $X_3$   | 180   | 540  | 900  |
| Solid-liquid ratio (g/mL) | $x_4$ | $X_4$   | 1:10  | 1:25 | 1:40 |

**Table S2:** The coded values and corresponding actual values of the optimization parameters used for ultrasound-assisted extraction

| Independent variable      | Coded | Uncoded | Level |      |      |
|---------------------------|-------|---------|-------|------|------|
|                           |       |         | -1    | 0    | 1    |
| Solvent concentration (%) | $x_1$ | $X_1$   | 0     | 50   | 100  |
| Time (min)                | $x_2$ | $X_2$   | 10    | 45   | 80   |
| Ultrasound Power (W)      | $x_3$ | $X_3$   | 40    | 120  | 200  |
| Solid-liquid ratio (g/mL) | $x_4$ | $X_4$   | 1:10  | 1:45 | 1:80 |
